## Current perspectives on the management of refractory or relapsed classic hodgkin lymphoma in Brazil: Balancing efficacy, safety, and tolerability

Flávia Dias Xavier<sup>1,2</sup>, Danielle Leão Cordeiro de Farias<sup>3</sup>, Abrahão Elias Hallack Neto<sup>4</sup>, Glaciano Nogueira Ribeiro<sup>5</sup>, Marco Aurelio Salvino de Araujo<sup>6,7</sup>, Thiago Xavier Carneiro<sup>8</sup> and Otavio Cesar Carvalho Guimarães Baiocchi<sup>9,10</sup>

<sup>1</sup>Hospital Universitário de Brasília-Universidade de Brasília/Ebserh, Brasília, DF, Brazil

<sup>2</sup>Hospital DF Star, Oncologia D'Or, Rede D'Or, Brasília, DF, Brazil

<sup>3</sup>Hospital A Beneficência Portuguesa de São Paulo, São Paulo, SP, Brazil

<sup>4</sup>Universidade Federal de Juiz de Fora, Juiz de Fora, MG, Brazil

<sup>5</sup>Clínica Hematológica/Grupo Oncoclinicas, Belo Horizonte, MG, Brazil

<sup>6</sup>Universidade Federal da Bahia, Salvador, BA, Brazil

<sup>7</sup>Instituto D'Or de Pesquisa e Ensino, IDOR, BA, Brazil

<sup>8</sup>Universidade Estadual do Pará, Belém, PA, Brazil

<sup>9</sup>Universidade Federal de São Paulo, São Paulo, SP, Brazil

<sup>10</sup>Hospital Alemão Oswaldo Cruz, São Paulo, SP, Brazil

**Correspondence to:** Flávia Dias Xavier, *email:* flavia.xavier@unb.br

**Keywords:** brentuximab vedotin; drug therapy; hodgkin lymphoma; nivolumab; pembrolizumab

**Received:** February 17, 2023

**Accepted:** November 06, 2023

**Published:** December 12, 2023

**Copyright:** © 2023 Xavier et al. This is an open access article distributed under the terms of the [Creative Commons Attribution License](https://creativecommons.org/licenses/by/4.0/) (CC BY 4.0), which permits unrestricted use, distribution, and reproduction in any medium, provided the original author and source are credited.

### ABSTRACT

**Classic Hodgkin lymphoma (CHL), which accounts for 90–95% of all cases of Hodgkin lymphoma, is the most frequent cancer in adolescents and the most frequent lymphoma in adolescents and young adults. Despite progressive improvements over past decades and the general sensitivity of CHL to frontline chemotherapy, approximately 10–15% of patients have refractory disease that either does not respond to such therapy or progresses after an initial partial response. In patients with refractory or relapsed disease, standard treatment until recently consisted mainly of salvage chemotherapy, in many cases followed by high-dose chemotherapy and autologous stem-cell transplantation. However, improved understanding of the pathobiology of CHL, coupled with the introduction of novel agents, has markedly changed the treatment landscape in the past decade. Although refractory or relapsed CHL continues to be challenging, the therapeutic landscape is undergoing profound changes brought about by novel agents, particularly brentuximab vedotin and immunotherapy. In this review, we discuss the most salient treatment options for adult patients with refractory or relapsed CHL, with a special focus on the Brazilian healthcare setting, which is constrained by inherent characteristics of this system. In the attempt to balance efficacy, safety and tolerability, practicing physicians must rely on clinical trials and on results from real-world studies, and use their own point of view and experience, as well as patient characteristics and previous therapy, to make treatment decisions for refractory or relapsed CHL.**

## INTRODUCTION

Classic Hodgkin lymphoma (CHL) accounts for 90–95% of all cases of Hodgkin lymphoma (HL), with the remaining cases being currently classified as nodular lymphocyte-predominant HL [1–3]. CHL, which is divided into four subtypes with somewhat distinct epidemiological features, is very rare before 12 years of age, but is the most frequent cancer in adolescents and the most frequent lymphoma in adolescents and young adults, with a second peak in late life for certain subtypes [1, 4]. CHL most often involves cervical lymph nodes and/or the mediastinal, axillary and para-aortic regions, and 50–60% of patients have early-stage disease (stage I or II) at diagnosis [1, 3, 5]. Approximately 10–15% of patients have refractory disease that either does not respond to initial therapy or progresses after an initial partial response; moreover, relapse may occur in 10–15% of patients with favorable prognosis, early stages (I or II) and in 15–30% of patients with more advanced disease [6–9]. Although 80–90% of newly diagnosed patients can be cured when treated with contemporary frontline therapy, CHL is primarily refractory or recurs in nearly 10% of patients with early-stage disease and up to 30% of those with advanced (stage III or IV) disease [6–13]. Primary refractoriness is adequately defined either by progression during chemotherapy or radiotherapy at any time up to 3 months after the end of frontline treatment or by persistence of substantial residual uptake on positron-emission tomography (PET) using the quantitative 5-point-scale Deauville score [4]. Nevertheless, primary refractoriness is also defined more simply by progression at any time up to 3 months after the end of frontline treatment, by lack of complete response (CR) or lack of CR or partial response (PR) to such treatment, or by persistence of substantial residual uptake on PET scanning [14, 15]. Additionally, a distinction can be made between early relapse (3 to 12 months from frontline treatment) and late relapse (>12 months) [14, 15]. As a general rule, response assessment in CHL follows the Lugano criteria [16].

In patients with refractory or relapsed HL, standard treatment until recently consisted mainly of salvage chemotherapy, in many cases followed by high-dose chemotherapy and autologous stem-cell transplantation (ASCT) [17–24]. However, improved understanding of the pathobiology of CHL, coupled with the introduction of novel agents, has markedly changed the treatment landscape in the past decade [4, 24–31]. In this article, we discuss the management of adult patients with refractory or relapsed CHL, with a special focus on the Brazilian healthcare setting and in an attempt to assess the most salient issues relating to efficacy, safety and tolerability of salvage therapy.

## EPIDEMIOLOGY AND CLINICAL FEATURES OF CHL IN BRAZIL

In several countries, HL represents 10–15% of all cases of lymphomas [4, 32, 33]. In Brazil, nationwide estimates for 2020 were of nearly 12,000 new cases of non-Hodgkin lymphomas and a total of nearly 2,600 cases of HL every year; mortality data do not appear to have been updated recently, but in 2017 it was estimated that crude rates were 0.35/100 thousand men and 0.25/100 thousand women, with a total of 355 yearly deaths [34]. Since 2009, countrywide information on HL has been collected by the Brazilian Prospective Hodgkin's Lymphoma Registry (NCT02589548), which was implemented to gather data on the sociodemographic and clinical features, as well as treatment modalities and outcomes for patients with HL aged 12 years and older [3, 35].

The first results of the registry concern 674 patients with CHL analyzed out of a total of 756 patients registered from January 2009 to 2014 [3]. The key features of the 674 patients with CHL are shown in Table 1. Moreover, extranodal involvement was present in 32% of patients, and bulky mediastinal disease in 28%. No results were shown for immunohistochemistry, but it is well known that nearly 100% of cases of CHL express CD30 [1, 4]. Of note, the prevalence of advanced disease and adverse prognostic features (65%) was higher than in many case series [1, 5].

## FRONTLINE TREATMENT IN BRAZIL

Decades of clinical research have established the efficacy and general safety of frontline treatment for patients with HL [4]. The key phase 3 trials with doxorubicin, bleomycin, vinblastine and dacarbazine (ABVD) in stage III/IV disease have shown rates of progression-free survival (PFS) and overall survival (OS) at 3 years of 75% and 90%, respectively [8], or similar rates (of 76% and 90%, respectively) for 5-year PFS and OS among all patients (i.e., including unfavorable stage I/II disease) [10]. In another phase 3 trial, results according to stage (I/II vs. III/IV) were failure-free survival rates of 82% vs. 71% at 3 years and 82% vs. 67% at 5 years, respectively; OS rates according to stage were 94% vs. 85% at 5 years [9]. Specifically for unfavorable stage I/II disease treated with four or six cycles of ABVD plus involved-field radiotherapy, the 5-year event-free survival was 85.9% or 89.9%, with 5-year OS of 94% or 93%, respectively (the corresponding rates were 88.8% and 93% for bleomycin, etoposide, doxorubicin, cyclophosphamide, vincristine, procarbazine and prednisone [BEACOPP]) [13]. Finally, among patients with stage IIB, III, or IV, or an international prognostic score of  $\geq 3$ , the 7-year rates of event-free survival were 78% among patients randomized to BEACOPP and 71% among those

**Table 1: Selected characteristics of 674 patients with CHL, according to Biasoli et al. [3]**

| Characteristics                                          | N (%)    |
|----------------------------------------------------------|----------|
| Female sex                                               | 342 (51) |
| Age <60 years                                            | 610 (91) |
| Eastern Cooperative Oncology Group performance status <2 | 585 (87) |
| Ann Arbor stage                                          |          |
| I                                                        | 5 (<1)   |
| II                                                       | 300 (45) |
| III                                                      | 152 (23) |
| IV                                                       | 204 (30) |
| Missing                                                  | 3 (<1)   |
| Risk group*                                              |          |
| Early favorable                                          | 44 (6)   |
| Early unfavorable                                        | 178 (26) |
| Advanced                                                 | 437 (65) |
| Missing                                                  | 15 (1)   |
| Presence of B symptoms                                   | 463 (69) |
| Histological subtype                                     |          |
| Nodular sclerosis                                        | 528 (78) |
| Mixed cellularity                                        | 86 (13)  |
| Lymphocyte-rich                                          | 11 (2)   |
| Lymphocyte-depleted                                      | 9 (1)    |
| Classical HL unclassified                                | 40 (6)   |

\*According to the German Hodgkin Study Group risk group classification [41].

randomized to ABVD, with 7-year OS rates of 89% and 84%, respectively [22].

Although patients and researchers from Brazil increasingly participate in international clinical trials, and notwithstanding many publications on basic and correlative science in HL, to our knowledge there are scant published results on treatment outcomes from local trials with older treatment regimens [36]. Likewise, case series are scarce and present results that are less relevant in light of current standards of care for newly diagnosed patients [37–39]. Nevertheless, results from the Brazilian Prospective Hodgkin's Lymphoma Registry are a valuable source of information on frontline treatment patterns in this country. The analysis of 674 patients with CHL registered from January 2009 to 2014 has shown a median time from diagnosis to treatment initiation of 21 days, not unlike the median reported from the US National Cancer Database for patients diagnosed between 1998 and 2011 (26 days) [40]. Of note, the median time from the onset of symptoms to diagnosis was 6 months. Regarding treatment patterns, 93% of the 674 patients received ABVD as frontline treatment, and the remaining were treated with standard or escalated BEACOPP or other regimens. Radiotherapy was added to ABVD in 33% of the patients with advanced disease, in 65% of those with early unfavorable disease,

and in 77% of those with early favorable disease, as ascertained using the German Hodgkin Study Group (GHSG) risk classification [41]. This was involved-field radiotherapy in 80% of patients thus treated and extended-field radiotherapy in the remaining 20% [3]. With regard to overall treatment toxicity, 17 (2.5%) patients died from complications during frontline treatment; this rate is higher than that typically reported in large clinical trials (<1.0%) [9, 10], even though a rate of 2% has also been reported [8].

Regarding treatment outcomes, the 3-year PFS rates in early favorable, early unfavorable, and advanced disease were 95%, 88%, and 66%, respectively. Corresponding OS estimates at 3 years were 100%, 96%, and 86%, respectively. With a few exceptions, such PFS and OS results are somewhat inferior to some of those reported from the large clinical trials discussed above [8–10, 13, 22]. Moreover, analysis of PFS and OS according to socioeconomic status (SES) has disclosed statistically significant differences favoring higher versus lower SES [35], thus echoing findings from Brazil and other countries in HL and other cancer types [42–47]. These results suggest considerable room for improvement, particularly in light of the fact that registered patients are likely to represent those seen in referral centers, and given the

association between hospital volume and outcomes in HL [48]; in other words, results may be worse among Brazilian patients with CHL not participating in the registry.

Given the availability of novel agents with activity in refractory or relapsed CHL [14, 15, 24, 26, 29] (discussed in more detail below regarding their role in refractory and relapsed disease), the standard of care for frontline therapy is subject to change soon. For example, brentuximab vedotin (BV), an anti-CD30 antibody conjugated with the cytotoxic agent monomethyl auristatin E, can be safely combined with doxorubicin, vinblastine and dacarbazine (AVD), although the evidence so far suggests that it should not be combined with ABVD due to a potentiation of the risk of pulmonary toxicity from bleomycin [49]. In a phase 3 trial, BV was combined with AVD and compared with ABVD, showing an improvement in PFS when used as frontline therapy in patients with advanced CHL [25, 50]. Although modified PFS was the primary endpoint in that trial [41], recently data from a median of 6 years of follow-up showed both PFS and OS advantage of BV-AVD over those who received ABVD [51]. Since patients with CHL often benefit from second- and third-line treatments, OS gains can only be demonstrated after long-term follow-up. As a result, PFS is generally accepted as a surrogate endpoint in CHL. Nevertheless, BV—in combination with AVD—is already considered a frontline option in some guidelines [52], and is approved for this indication in several countries, including Brazil (for the latter, in stage IV). Other novel agents that are being investigated for frontline treatment of advanced CHL are the anti-programmed death 1 (PD-1) antibodies, nivolumab and pembrolizumab. Nivolumab was combined in a concomitant or sequential fashion with AVD in phase 2 trials, and early results have been encouraging both in early-stage, unfavorable CHL [53] and among patients with more advanced disease [54]. Likewise, pembrolizumab combined sequentially with AVD was tested in a single-arm phase 2 trial, with promising early results in early unfavorable and advanced-stage disease [55]. There are currently no published data on the use of these novel agents for newly diagnosed patients in Brazil, where these monoclonal antibodies have a clear niche in refractory and relapsed disease, as discussed below.

## MANAGEMENT OF REFRACTORY AND RELAPSED DISEASE

### Chemotherapy and targeted therapy with older agents

Chemotherapy has been the mainstay of treatment for HL for nearly six decades [56], and the current chemotherapy standards of ABVD and BEACOPP—depending on risk stratification—continue to play a key role in frontline therapy, notwithstanding the increasing addition of targeted therapy and/or immunotherapy to

the therapeutic arsenal, or even to the possibility of chemotherapy-free regimens in the future. In Brazil, procarbazine is not currently available, thus influencing the choice of frontline chemotherapy. Patients with refractory or relapsed CHL are still treated with curative intent, typically with one of a variety of salvage chemotherapy regimens, which is usually followed by response consolidation through the use of ASCT in patients who are eligible to this procedure [4, 17, 18, 24, 26]. For patients who have already received an ASCT or who are not eligible because of age or comorbidities, an individualized approach is often recommended, with sequential use of conventional or novel agents, or with participation in clinical trials [41]. Although the chemotherapy agent bendamustine, and the older targeted agents, lenalidomide and everolimus, have been assessed as single agents or in combinations as treatment for refractory or relapsed HL in phase 2 trials, they are not widely in this era of novel targeted agents and immunotherapy, discussed below [24, 41]. Nevertheless, these older agents are listed as treatment options in the National Comprehensive Cancer Network guidelines (although not approved for HL in the US) [52], and can certainly be used in selected cases [4, 26].

### The expanding niche for novel agents

As several other hematologic malignancies, CHL consistently expresses antigens that may serve as specific targets for monoclonal antibodies; foremost among these targets for its ubiquity and relevance in CHL is CD30. The antibody BV, which targets CD30, was initially used in patients with advanced HL with a relapse after ASCT and a median of 3.5 prior lines (range, one to 13 regimens). In a pivotal, single-arm phase 2 trial enrolling 102 patients, the response rate was 75% (with CR in 34% of patients), with acceptable toxicity [57]. Importantly, prolonged follow-up of those patients disclosed a median PFS of 9.3 months in the overall population, and the 34 patients with a CR had 3-year OS and PFS rates of 73% and 58%, respectively; moreover, 47% of patients with a CR (i.e., 34 of 102 [16%] of the total) remained progression-free after a median of 53 months of follow-up [58]. After 5 years of follow-up, median OS and PFS had not been reached in the 34 patients achieving CR; moreover, 13 of these patients remained relapse-free longer than 5 years and may have been cured (four of these patients with the help of a subsequent allogeneic transplantation) [59]. A smaller phase 2 trial among patients with a relapse after allogeneic transplantation showed a response rate of 50% (CR of 38%) and a median PFS of 7.8 months [60]. Interestingly, retreatment of patients with a previous CR or PR to BV led to a response rate of 60% (30% CR) [61].

Results from these and other trials led to the design of a phase 3 trial comparing BV versus placebo as consolidation for patients undergoing ASCT with a high risk of relapse (Table 2) [14]. High risk was

**Table 2: Selected results from clinical trials or trial cohorts among patients with refractory or relapsed CHL**

| Agent         | First author(s)                                                               | Setting                                      | N*  | Overall RR | CR rate | PFS                           | Selected safety results**                                                                                                                                   | Discontinuation due to adverse events |
|---------------|-------------------------------------------------------------------------------|----------------------------------------------|-----|------------|---------|-------------------------------|-------------------------------------------------------------------------------------------------------------------------------------------------------------|---------------------------------------|
| BV            | Moskowitz, et al. 2003 [14]<br>Moskowitz, et al. 2018 [62]                    | Consolidation after ASCT                     | 165 | NA         | NA      | 59% at 5 years                | Treatment-emergent peripheral neuropathy, 67% <sup>†</sup><br>Neutropenia of any grade, 35%<br>Treatment-emergent pulmonary toxicity, 5%                    | 33%                                   |
| BV            | Younes, et al. 2012 [57]<br>Gopal, et al. 2015 [58]<br>Chen, et al. 2016 [59] | Relapse after ASCT                           | 102 | 75%        | 34%     | 22% at 5 years                | Peripheral sensory neuropathy, 42%<br>Neutropenia, 19%                                                                                                      | 20%                                   |
| BV            | Kuruvilla, et al. 2021 [15]                                                   | Relapse after/ineligible to ASCT             | 153 | 54%        | 24%     | 8 months (median PFS)         | Peripheral neuropathy of any grade, 13%<br>Neutropenia of any grade, 10%                                                                                    | 16%                                   |
| BV            | Gopal, et al. 2012 [60]                                                       | Relapse after AlloSCT                        | 25  | 50%        | 38%     | 7.8 months (median PFS)       | Peripheral sensory neuropathy, 48%<br>Neutropenia of any grade, 28%                                                                                         | 36%                                   |
| Nivolumab     | Armand, et al. 2018 [75]                                                      | No prior BV                                  | 63  | 65%        | 29%     | 18 months (median)            | Not reported separately for this cohort, but overall in the trial, the most common events of any grade were diarrhea (35%) and fatigue (35%)                | 5%                                    |
| Nivolumab     | Armand, et al. 2018 [75]                                                      | Relapse after post-ASCT BV                   | 80  | 68%        | 13%     | 15 months (median)            | Not reported separately for this cohort, but overall in the trial, the most common events of any grade were diarrhea (35%) and fatigue (35%)                | 11%                                   |
| Nivolumab     | Armand, et al. 2018 [75]                                                      | Relapse after BV before or after ASCT        | 100 | 73%        | 12%     | 12 months (median)            | Not reported separately for this cohort, but overall in the trial, the most common events of any grade were diarrhea (35%) and fatigue (35%)                | 7%                                    |
| Nivolumab     | Younes, et al. 2016 [77]                                                      | Relapse after ASCT and BV                    | 80  | 66%        | 9%      | NA                            | The most common events of any grade were and fatigue (36%), pyrexia (31%), and diarrhea (26%)                                                               | 4%                                    |
| Pembrolizumab | Armand, et al. 2016 [72]                                                      | Relapse after BV (prior ASCT in 71%)         | 31  | 65%        | 16%     | 46% at 1 year                 | The most common treatment-related adverse events were hypothyroidism (16%), diarrhea (16%), nausea (13%), and pneumonitis (10%)                             | 7%                                    |
| Pembrolizumab | Chen, et al. 2017 [73]                                                        | Relapse after post-ASCT BV                   | 69  | 74%        | 22%     | 63% at 9 months for 3 cohorts | Not reported separately for this cohort, but overall in the trial, most relevant events of any grade were fever (24%), diarrhea (17%), hypothyroidism (14%) | 5.8%                                  |
| Pembrolizumab | Chen, et al. 2017 [73]                                                        | Relapse after BV, ASCT-ineligible            | 81  | 64%        | 25%     | 63% at 9 months for 3 cohorts | Not reported separately for this cohort, but overall in the trial, most relevant events of any grade were fever (24%), diarrhea (17%), hypothyroidism (14%) | 3.7%                                  |
| Pembrolizumab | Chen, et al. 2017 [73]                                                        | Relapse after ASCT (prior BV in 42%)         | 60  | 70%        | 20%     | 63% at 9 months for 3 cohorts | Not reported separately for this cohort, but overall in the trial, most relevant events of any grade were fever (24%), diarrhea (17%), hypothyroidism (14%) | 3.3%                                  |
| Pembrolizumab | Armand, et al. 2019 [76]                                                      | Consolidation after ASCT                     | 30  | NA         | NA      | 81% at 19 months              | Only treatment-related events reported: grade 2–3 transaminitis, 17%; grade 4 neutropenia, 3%; grade 2-3 diarrhea/colitis, 10%; grade 2 hypothyroidism, 3%  | 16%                                   |
| Pembrolizumab | Kuruvilla, et al. 2021 [15]                                                   | Relapse after (37%)/ineligible to (63%) ASCT | 151 | 66%        | 25%     | 13 months (median PFS)        | Hypothyroidism of any grade, 16%<br>Pyrexia of any grade, 13%<br>Diarrhea of any grade, 9%                                                                  | 13%                                   |

Abbreviations: AlloSCT: allogeneic stem-cell transplantation; ASCT: autologous stem-cell transplantation; BV: brentuximab vedotin; CR: complete response; NA: not applicable or not yet available; PFS: progression-free survival; RR: response rate. The ~ sign indicate approximate rates read from published Kaplan-Meier curves. \*Considering patients with the novel agent of interest. \*\*Reported terms. <sup>†</sup>Versus 19% with placebo, both rates using a standardized Medical Dictionary for Regulatory Activities query.

defined as primary refractoriness, relapse after frontline therapy with an initial remission of less than 12 months, or extranodal involvement at the start of salvage chemotherapy before ASCT. Treatment consisted of 16 cycles of BV, starting 30–45 days after ASCT. Following the positive early results with regard to PFS, the primary endpoint in the trial [14], updated results showed 5-year PFS rates of 59% with BV and 41% with placebo (hazard ratio of 0.52) [62]. Moreover, upfront consolidation with BV significantly delayed time to subsequent therapy. These phase 2 and 3 trials led to the approval of single-agent BV for the treatment of adult patients with CHL or CD30-positive HL in several countries and in different refractory/relapsed settings. Of note, BV is widely used in Brazil—depending on local reimbursement issues—and can be safely combined with other agents used among these patients, such as bendamustine [63–65] and multi-agent chemotherapy [66–68], thus providing enhanced treatment options in preparation for ASCT.

The combination of BV and bendamustine has been the subject of several phase 2 trials and observational studies for salvage therapy. In a phase 2 trial involving 40 patients with refractory or relapsed disease, a complete metabolic response was observed in 78.9% of 38 evaluable patients; the response rate was 75.0% in the primary-refractory subset, and 94.4% among patients with relapsed disease. The 3-year PFS and OS rates were 67.3% and 88.1%, respectively [63]. In a phase 2 trial among 55 patients (28 with primary refractory and 27 with relapsed disease), the response rate after a median of two cycles of BV combined with bendamustine was 92.5% (73.6% CRs) [65]. Updated results from this trial showed 3-year PFS and OS rates of 60% and 92%, respectively [69]. In an observational study from the Mayo Clinic involving 207 patients with refractory or relapsed disease eligible to ASCT and treated with a variety of salvage regimens, those treated with BV plus bendamustine had significantly higher overall and CR rates as first salvage therapy, and a larger number of patients were bridged to transplantation after BV plus bendamustine than after ifosfamide, carboplatin and etoposide, leading the authors to conclude that the former combination may be preferable to the latter [70]. Finally, in third or subsequent lines, the combination of BV and bendamustine led to a response rate of 79% (CR in 62%) among 30 patients treated in the real-life setting [71].

After nearly a century of unfulfilled promise, immunotherapy has finally come of age and taken center stage in cancer therapy, mostly due to the activity of immune checkpoint inhibitors (CPIs) and adoptive cell therapy, particularly chimeric antigen receptor T-cells. Over the past few years, HL has also become a beneficiary of such developments. Nivolumab and pembrolizumab are both CPIs targeting PD-1 and with single-agent activity in HL. This activity has been demonstrated in the setting of relapsed disease after BV in patients ineligible to ASCT

[72, 73], after ASCT [73–76], after ASCT and BV [72–77], and even after allogeneic transplantation (with previous BV in all cases) [78]. These trials led to the approval of both nivolumab and pembrolizumab in several countries, including Brazil, for the treatment of patients with refractory or relapsed CHL (Table 2). Moreover, nivolumab can be safely combined with BV, and such a combination produced a 3-year PFS rate of 77% as first salvage therapy in patients with refractory or relapsed CHL (91% among patients undergoing ASCT directly after study treatment) [79]. Recently, interim results from a phase 3 trial comparing pembrolizumab ( $N = 151$ ) versus BV ( $N = 153$ ) among a total of 304 patients with refractory or relapsed CHL have been published [15]. These patients were ineligible (63%) for or had relapsed after ASCT (37%), and 5% had received prior BV therapy. The CR rate was similar for both agents (25% versus 24%), but the overall response rate was nominally—although not statistically—higher for pembrolizumab (66%) than for BV (54%). After a median follow-up of 26 months, the median PFS was approximately 13 months with pembrolizumab and 8 months for BV (hazard ratio of 0.65). One treatment-related death from pneumonia occurred in the pembrolizumab arm, but the frequency of adverse events overall was similar in both arms, notwithstanding qualitative differences expected from these two agents (Table 2). These interim results await confirmation and may eventually influence the treatment algorithm for patients with refractory or relapsed CHL, depending on available and emerging data on the role of BV and CPIs in the first line [50, 52].

### Real-life experience with approved novel agents

The assessment of treatment outcomes in real life can also provide useful information on the effectiveness, safety and tolerability of novel agents, thus helping define their utility in clinical practice. There are many publications, most of which from European academic institutions, assessing outcomes outside of the clinical-trial setting. Many of these studies, not all of which summarized below, were included in a meta-analysis of 32 observational reports of single-agent BV in refractory or relapsed CHL reported recently [80]. The authors found pooled overall and CR rates of 63% and 33%, respectively, which are within the ranges reported in the clinical trials displayed in Table 2. Likewise, 1-year (range, 52% to 63%), 2-year (45% to 56%), and 5-year (32% to 33%) PFS, and 1-year (68% to 83%), 2-year (58% to 82%), and 5-year (58% to 62.0%) OS compared favorably with the results from clinical trials.

Individual studies on single-agent BV had sample sizes ranging from 53 to 509 patients, and some included CD30-positive HL rather than CHL. In general, the real-life response rates and tolerability to BV were similar to those reported in clinical trials. For example, the experience in 60 countries with the Named Patient Program showed overall and CR rates of 58–80% and 10–40%, respectively,

with PFS and OS results comparable to those from clinical trials [81, 82]. Moreover, several studies have reported prolonged disease control among responding patients [83, 84]. Results consistent with those from clinical trials have also been reported from the Czech Republic and Slovakia, where 58 patients had overall and CR rates of 47% and 33%, respectively, and 1-year, 2-year and 3-year OS rates from initiation of BV of 78%, 62%, and 41%, respectively [85]. Specifically in elderly patients or transplant-ineligible patients, real-life studies have also confirmed the effectiveness of BV, with response rates of 68% to 74% [84, 86]. Moreover, among 509 patients from France, Germany, Italy, Spain, and the UK with a mean age of 46 years, 73% of whom receiving second-line therapy for a first relapse and 44% undergoing ASCT, reported findings broadly consistent with those from guidelines [87]. In a series from Italy, 45 patients were treated with BV as bridge to transplant, whether autologous or allogeneic [88]. Ten of 16 transplant-naïve patients received ASCT, with 50% in CR before transplantation. Among 29 patients treated with BV as bridge to allogeneic transplantation, overall and CR rates were 62% and 24%, respectively, and 93% of them proceeded to transplantation. This and other real-life studies indicate that BV may allow for disease control before transplantation, potentially improving post-transplantation outcomes, also in refractory and heavily pretreated patients, with acceptable tolerability and no significant overlapping toxicities with prior therapies [88–92].

Specifically in the post-ASCT consolidation setting, results have been reported from Turkey and from Italy. In Turkey, 75 patients were analyzed at a median follow-up of 26 months, and 50 patients had an ongoing response (CR in 41 cases), for 2-year PFS and OS rates of 68% and 88%, respectively [93]. In Italy, 105 patients with CHL (both naïve and previously exposed to BV) were analyzed at a median follow-up of 20 months, and the 3-year PFS and OS rates were 62% and 86%, respectively, once again confirming the real-life activity of BV [94]. Although most observational studies were not comparative, a retrospective comparison between BV and chemotherapy in 312 patients from the UK and Germany with a relapse after ASCT (196 treated with BV) showed a median PFS of 27 months for BV, versus 13 months for chemotherapy, with longer 1-year OS rate for BV (78% versus 66%) [95].

Regarding safety and tolerability, real-life studies have also reported results consistent with those from clinical trials, but arguably with more variability, likely as a result of different standards for collection of reporting of adverse events. In the recent meta-analysis, the most common adverse events during single-agent BV were neutropenia (13–23%), anemia (9–39%), thrombocytopenia (4–5%), and grade  $\geq 3$  peripheral neuropathy (3–7%), leading the authors to conclude that these results support the safety of BV in the real-life setting [80]. Individual studies have variously reported rates of peripheral neuropathy ranging from 9% to 50% [86, 88,

92, 93, 95], grade 3/4 neurologic toxicity of 6% [81], and neutropenia from 10% to 29% [88, 92, 93]. Treatment discontinuation due to toxicity has been reported in 5–16% of patients [81, 93]. In general, the authors of these studies concluded that real-life treatment with single-agent BV is well tolerated and associated with a tolerability profile consistent with that from clinical trials [82, 84, 92, 93].

Given their later introduction for the treatment of refractory or relapsed CHL, in comparison with BV, currently there are fewer published studies on the real-life experience with nivolumab or pembrolizumab. For nivolumab, investigators from Turkey reported in 82 patients with refractory or relapsed CHL treated with nivolumab in a Named Patient Program [96, 97]. With a median follow-up of 29 months, the overall and CR rates were 70% and 36%, respectively, with an acceptable safety profile; only nine patients discontinued nivolumab due to serious adverse events, and the 2-year PFS and OS rates were 56% and 79%, respectively [97]. The authors concluded that nivolumab is efficacious among patients previously treated with BV, and that it may serve as a bridge to transplantation [96], thus echoing the opinion expressed by others, despite the potential for immune-mediated complications associated with allogeneic transplantation after nivolumab or pembrolizumab [98]. Investigators from Spain reported on 74 patients treated with nivolumab, with overall and CR rates of 58% and 31%, respectively, and a 2-year OS rate of 52%. Treatment-related adverse events were reported in 57% of patients (grade  $\geq 3$  in 9%). The authors concluded that the activity and safety of nivolumab were comparable to those reported in clinical trials [99]. For pembrolizumab, real-life data come from a US study including 53 patients with CHL treated with this agent or with nivolumab. The combined overall and CR were 68% and 45%, respectively, and 1-year PFS and OS rates were 75% and 89%, respectively. Importantly, the toxicity was similar to that described in clinical trials [100]. Finally, the GHSG has recently presented results in abstract form relating to 58 CHL patients with a median age of 48 years treated with an anti-PD-1 antibody [101]. Most patients had previous BV therapy (86%) or ASCT (62%). Overall and CR rates were 67% and 20%, respectively, and 2-year PFS and OS rates were 38% and 79%, respectively. Grade 3/4 treatment-related toxicities were reported in 32% of patients. Once again, these results resemble those from clinical trials.

## CURRENT PROSPECTS AND EXPERIENCE IN BRAZIL

### Published experience with transplantation

The published literature on the management of refractory or relapsed adult patients in Brazil is relatively scarce, with the exception of retrospective series on ASCT [102–106]. Based on 694 patients undergoing frontline

**Table 3: Selected characteristics of patients with CHL treated with autologous stem-cell transplantation in Brazil**

| Characteristics                       | Series                             |                                 |                                 |
|---------------------------------------|------------------------------------|---------------------------------|---------------------------------|
|                                       | Fatobene et al. [102]<br>(N = 107) | Duarte et al. [104]<br>(N = 54) | Duarte et al. [106]<br>(N = 77) |
|                                       | N (%) or mean                      | N (%) or mean                   | N (%) or median                 |
| Year of ASCT                          | 1995 to 2014                       | 2009 to 2015                    | 1998 to 2006                    |
| Female sex                            | 61 (57)                            | 22 (41)                         | 31 (40)                         |
| Age at diagnosis                      | 26 years                           | 28 years                        | 23 years                        |
| Ann Arbor stage at diagnosis          |                                    |                                 |                                 |
| I/II                                  | 47 (44)                            | 29 (56)                         | 27 (35)                         |
| III/IV                                | 59 (55)                            | 19 (37)                         | 50 (65)                         |
| Missing                               | 1 (1)                              | 4 (8)                           | 0                               |
| B symptoms at diagnosis               | 83 (78)                            | 34 (65)                         | 55 (71)                         |
| Histological subtype                  |                                    |                                 |                                 |
| Nodular sclerosis                     | 82 (77)                            | 46 (89)                         | 51 (66)                         |
| Mixed cellularity                     | 8 (8)                              | 1 (2)                           | 20 (26)                         |
| Lymphocyte-rich                       | 2 (2)                              | 1 (2)                           | 1 (1)                           |
| Lymphocyte-depleted                   | 2 (2)                              | 2 (4)                           | 5 (7)                           |
| Classical HL unclassified             | 13 (12)                            | 2 (4)                           | 0                               |
| CR to frontline therapy               | 52 (49)                            | 21 (40)                         | NR                              |
| Relapse <12 months for patients in CR | 21 (40)                            | 11 (52)                         | NR                              |

Not all percentages add to 100 due to rounding. Abbreviation: NR: not reported.

therapy, investigators from the University of Sao Paulo reported on 188 CHL patients with refractory or relapsed CHL, 107 of whom receiving ASCT from 1995 to 2014 [102]. Primary refractoriness was defined as less than PR at the end of frontline chemotherapy and was present in 99 (14% of the total) patients, whereas relapsed disease—defined as a relapsed after achieving a CR for at least 3 months—was present in 89 (13% of the total) patients. Selected characteristics of patients undergoing ASCT are summarized in Table 3. After ASCT, 90 patients (84%) were in CR, 13 (12%) were refractory; after a median follow-up of 6.7 years, 5-year PFS and OS rates were 60% and 74%, respectively, results within the ranges reported in the literature [17, 18, 20, 107, 108]. Four (4%) patients died of transplant-related mortality, a rate that is on the upper end of the range reported in other series [20, 107, 108]. Factors significantly associated with both PFS and OS were a single line of salvage therapy before ASCT (versus more than one) and a CR before ASCT [102]. The authors concluded that ASCT is efficacious and safe of in the treatment of refractory and relapsed CHL at a large public cancer center in Brazil, and that novel agents, including BV and CPIs are likely to improve transplantation outcomes in the near future. A second case series from the same university hospital provides insights on the use of nivolumab after ASCT [103]. Of 171 patients with CHL treated between 2015 and 2019, 25 (16%) had primary

refractoriness, and an additional 15 patients relapsed after a CR. A total of 24 among these 40 patients underwent ASCT, but among the other patients who were ineligible or did not receive ASCT due to the lack of CR to salvage therapy, five received nivolumab; all five patients could then receive ASCT and were in CR at the time of reporting, with no use of consolidation therapy. A third series comes from another university center and concerns 52 patients undergoing ASCT in Fortaleza, Brazil, between 2009 and 2015, with selected patient characteristics also shown in Table 3 [104]. After ASCT, 81% of patients were in CR, and 5-year PFS and OS rates were approximately 58% and 85%, respectively. Finally, a series of 77 patients with HL considered for ASCT between 1998 and 2006 at one of three centers in Brazil, 53 of whom actually underwent autografting [106]. Table 3 displays selected characteristics of the overall sample of 77 patients. The results showed a higher transplant-related mortality (10% of 77 patients), with 5-year PFS and OS rates of approximately 35% and 55%, respectively. These results compare unfavorably with those from the other series from Brazil and other countries, and the reasons for these findings remain unclear [17, 18, 20, 102, 104, 107, 108].

In addition to being a matter of debate for several years [4], the availability of novel agents has further increased doubts about the role and the timing of allogeneic transplantation in HL [91]. Nevertheless,



the modality has a role in selected patients due to its potential for cure, particularly with reduced-intensity conditioning regimens. However, suitable donors are often not available, and haploidentical transplantation is under investigation for selected cases. Investigators from Brazil retrospectively evaluated 24 patients undergoing haploidentical transplantation for refractory or relapsed HL [109]. After a median follow-up 30 months, 2-year PFS and OS rates were 54% and 66%, respectively, with a cumulative incidence of non-relapse-related mortality of 26%, usually from infections. The authors concluded that this treatment modality is an option for patients with a relapse after ASCT, with favorable survival and relatively low risk of graft-versus-host disease.

In the Brazilian Prospective Hodgkin's Lymphoma Registry, no specific information on primary refractoriness or relapse rates was provided, but these events were used to compute Kaplan-Meier estimates for the PFS results discussed above [3]. Moreover, of 652 patients evaluated for response to frontline treatment, 73% had a CR, 12% had unconfirmed CR, 4% had a PR, 2% had stable disease, and 9% had progressive disease. Thus, depending on the definition used, one may say that at least 11% of patients were primarily refractory (i.e., did not have at least a PR). Moreover, the overall 3-year PFS rate was 74%. Thus, one may infer that approximately 26% of patients in this series have refractory or relapsed disease with a median follow-up of 37 months [3]. At present, no results are available from the Brazilian Prospective Hodgkin's Lymphoma Registry regarding the management of refractory or relapsed patients, whether with transplantation or novel agents, but such results are awaited.

### Availability and use of novel agents

In Brazil, BV (1.8 mg/kg intravenously every 3 weeks), nivolumab (3 mg/Kg intravenously every 2 weeks or 240 mg intravenously every 2 weeks or 480 mg intravenously every 4 weeks), and pembrolizumab (200 mg intravenously every 3 weeks or 400 mg every 6 weeks) are available as single agents for the treatment of adult patients with refractory or relapsed CHL, with slight differences in their indications and with the additional approval of pembrolizumab for pediatric patients. The evolving role of each of the currently available monoclonal antibodies leads to questions about how to make best use of each novel agent, whether alone or in combination, in frontline, as a bridge to ASCT, as consolidation after ASCT, or even as an option after failure of ASCT. Unfortunately, access to these agents is not universally available in Brazil; although healthcare is the responsibility of the federal, state and municipal governments and ensured by the constitution, the provision of care in this country is done in a dual manner [110]. A private healthcare system, available to only around 29% of the population [111], typically ensures

access to all agents approved in the country following their label indications, with specific constraints for oral drugs. On the other hand, the government-funded public system suffers severe constraints and in many cases only offers access to novel therapies through judicial means [112]. It remains unclear whether such dual healthcare system explain the differences in outcomes according to SES discussed above [35]. At present, only BV is part of the treatment recommendations for HL in the public healthcare system, with indications as post-ASCT consolidation or relapse or refractoriness after ASCT [113]. However, at the time of this writing, reimbursement is not yet sufficient to ensure wide use of BV in our public healthcare system.

### Balancing efficacy, safety, and tolerability

The history of clinical trials for HL is one of the models of success in the treatment of cancer. As a result of progressive developments over the years, the balance between efficacy and safety from the use of chemotherapy and radiotherapy, particularly with regard to long-term toxicity in younger patients, has become one of the key concerns on the part of experts in this disease [114, 115]. Therefore, it is important to assess patient and physician preferences in the choice of treatment for patients with CHL. In an assessment of preferences in Europe, 5-year PFS and OS rates were the most important treatment attributes to patients choosing frontline therapy, whereas the importance of efficacy and safety attributes varied among physicians according to patient profiles [116]. A similar emphasis on efficacy on the part of patients was elicited in a US survey [117]. We are not aware of similar surveys among patients with refractory or relapsed disease, but results from the GHSG indicate that survivors of HL frequently express concern about recurrence and late toxicity from treatment [118].

Similar considerations regarding the balance between efficacy and safety also apply to novel agents, which are now changing the treatment algorithm in CHL both in the frontline and in the refractory/relapsed setting. To our knowledge, there are no published results of surveys regarding patient or physician preferences for novel agents, in reference to their risk-benefit profiles. Therefore, at present indirect comparisons need to be made for such an assessment. Table 2 presents selected efficacy and safety results from clinical trials of single-agent BV and CPIs for patients with refractory or relapsed CHL [14, 15, 57–60, 62, 72, 73, 75–77]. The accumulated experience with BV thus far suggests that the most specific adverse events are peripheral neuropathy and neutropenia, even though other, less specific events are usually more common and include fatigue, weight loss, fever, abdominal pain, stomatitis, nausea/vomiting, diarrhea, constipation, upper respiratory tract infection, anemia, and lymphopenia [119]. Peripheral neuropathy is

a frequent concern in patients receiving BV, but in most cases it is of grade 1 or 2, and with dose adjustments it tends to improve or resolve over time in up to 90% of patients [62, 119, 120]. Of note, quality of life decreases were modest when BV was compared with placebo as consolidation among patients at high risk of relapse after auto-HSCT [121]. Regarding the accumulated experience with nivolumab in CHL, the most specific adverse events are colitis or diarrhea, pneumonitis, hypothyroidism, and infusion-related reactions, but more frequent events include fatigue, fever, musculoskeletal pain, rash, nausea, pruritus, cytopenias, liver-function abnormalities, and increased lipase [122]. A somewhat similar profile of adverse events is expected with pembrolizumab in CHL, given the similar mechanism of action and association with immune-mediated phenomena [123].

Although no definitive conclusions can be drawn from such indirect comparisons, and given the existence of only interim efficacy data from direct comparison between BV and pembrolizumab [15], the current literature suggests that novel agents have somewhat distinct safety profiles, and that balancing risks and benefits from these agents largely depends on patient characteristics and previous therapy, physician preference and experience, and drug availability [120]. Moreover, the results from real-life studies, discussed above, suggest that novel agents can generally be administered to patients with refractory or relapsed CHL based on their current indications and with expected results that are similar to those from clinical trials, particularly if recommended precautions are followed regarding the recognition and management of toxicity.

## CONCLUSIONS

Refractory or relapsed CHL continues to represent a therapeutic challenge, but the introduction of novel agents seems to have change the outlook for patients over the last decade. The therapeutic landscape is undergoing profound changes brought about by these agents, and their interplay with autologous and allogeneic transplantation continues to evolve. The management of patients with refractory or relapsed CHL in the Brazilian healthcare setting is constrained by inherent characteristics of this system, and a similar situation may be found in other countries. In the attempt to balance efficacy, safety and tolerability of salvage therapy, practicing physicians can rely on clinical trials and on results from real-life studies with novel agents. The accumulated literature thus far suggests that BV and CPIs are all active in refractory or relapsed CHL, and that they have somewhat distinct safety profiles and slightly differing indications. As a result, patient characteristics and previous therapy, physician preference and experience, and drug availability should dictate treatment choice for refractory or relapsed CHL.

## Author contributions

Otavio Cesar Carvalho Guimarães Baiocchi conceived and coordinated the Project. Flávia Dias Xavier and Danielle Leão Cordeiro de Farias wrote the manuscript with support from Abrahão Elias Hallack Neto, Glaciano Nogueira Ribeiro, Marco Aurelio Salvino de Araujo, Thiago Xavier Carneiro and Otavio Cesar Carvalho Guimarães Baiocchi. All authors discussed the results, reviewed the text and contributed to the final manuscript.

## ACKNOWLEDGMENTS

Medical writing support was provided by Dr. Everardo Saad from Dendrix.

## CONFLICTS OF INTEREST

XAVIER, FX received fees for serving as an advisory board member for Amgen, Janssen, AbbVie, Takeda, Bristol Myers Squibb, and for preparing medical presentations for Takeda, Janssen, Novartis and Amgen. FARIAS, DLC received honoraria as speaker for Takeda. HALLACK-NETO, AE received fees for preparing medical presentations for Dr. Reddys. GN, RIBEIRO, received fees for serving as an advisory board member Janssen, Abbvie, AstraZeneca, Lily and Bristol Myers Squibb. ARAUJO, MAS has received honoraria for advisory committee and as speaker for Takeda. BAIOCCHI, OCC received honoraria for advisory committee and as speaker for Takeda, MSD, Roche, ABBVIE e Astra Zeneca. CARNEIRO, TX report no conflicts of interest in this work.

## FUNDING

This manuscript was funded by Takeda Pharmaceuticals Brazil-São Paulo-SP.

## REFERENCES

1. Swerdlow SH, Campo E, Harris NL, Jaffe ES, Pileri SA, Stein H, Thiele J (Eds). WHO Classification of Tumours of Haematopoietic and Lymphoid Tissues (Revised 4th edition). IARC Publications. 2017.
2. Laurent C, Do C, Gourraud PA, de Paiva GR, Valmary S, Brousset P. Prevalence of Common Non-Hodgkin Lymphomas and Subtypes of Hodgkin Lymphoma by Nodal Site of Involvement: A Systematic Retrospective Review of 938 Cases. *Medicine (Baltimore)*. 2015; 94:e987. <https://doi.org/10.1097/MD.0000000000000987>. [PubMed]
3. Biasoli I, Castro N, Delamain M, Silveira T, Farley J, Simões BP, Solza C, Praxedes M, Baiocchi O, Gaiolla R, Franceschi F, Sola CB, Boquimpani C, et al. Treatment

- outcomes for Hodgkin lymphoma: First report from the Brazilian Prospective Registry. *Hematol Oncol.* 2018; 36:189–95. <https://doi.org/10.1002/hon.2450>. [PubMed]
4. Brice P, de Kerviler E, Friedberg JW. Classical Hodgkin lymphoma. *Lancet.* 2021; 398:1518–27. [https://doi.org/10.1016/S0140-6736\(20\)32207-8](https://doi.org/10.1016/S0140-6736(20)32207-8). [PubMed]
  5. Zhang Y, Zhang J, Zeng H, Zhou XH, Zhou HB. Nomograms for predicting the overall and cancer-specific survival of patients with classical Hodgkin lymphoma: a SEER-based study. *Oncotarget.* 2017; 8:92978–88. <https://doi.org/10.18632/oncotarget.21722>. [PubMed]
  6. Eich HT, Diehl V, Görgen H, Pabst T, Markova J, Debus J, Ho A, Dörken B, Rank A, Grosu AL, Wiegel T, Karstens JH, Greil R, et al. Intensified chemotherapy and dose-reduced involved-field radiotherapy in patients with early unfavorable Hodgkin's lymphoma: final analysis of the German Hodgkin Study Group HD11 trial. *J Clin Oncol.* 2010; 28:4199–206. <https://doi.org/10.1200/JCO.2010.29.8018>. [PubMed]
  7. Engert A, Plütschow A, Eich HT, Lohri A, Dörken B, Borchmann P, Berger B, Greil R, Willborn KC, Wilhelm M, Debus J, Eble MJ, Sökler M, et al. Reduced treatment intensity in patients with early-stage Hodgkin's lymphoma. *N Engl J Med.* 2010; 363:640–52. <https://doi.org/10.1056/NEJMoa1000067>. [PubMed]
  8. Johnson PW, Radford JA, Cullen MH, Sydes MR, Walewski J, Jack AS, MacLennan KA, Stenning SP, Clawson S, Smith P, Ryder D, Hancock BW, and United Kingdom Lymphoma Group LY09 Trial (ISRCTN97144519). Comparison of ABVD and alternating or hybrid multidrug regimens for the treatment of advanced Hodgkin's lymphoma: results of the United Kingdom Lymphoma Group LY09 Trial (ISRCTN97144519). *J Clin Oncol.* 2005; 23:9208–18. <https://doi.org/10.1200/JCO.2005.03.2151>. [PubMed]
  9. Gordon LI, Hong F, Fisher RI, Bartlett NL, Connors JM, Gascoyne RD, Wagner H, Stiff PJ, Cheson BD, Gospodarowicz M, Advani R, Kahl BS, Friedberg JW, et al. Randomized phase III trial of ABVD versus Stanford V with or without radiation therapy in locally extensive and advanced-stage Hodgkin lymphoma: an intergroup study coordinated by the Eastern Cooperative Oncology Group (E2496). *J Clin Oncol.* 2013; 31:684–91. <https://doi.org/10.1200/JCO.2012.43.4803>. [PubMed]
  10. Hoskin PJ, Lowry L, Horwich A, Jack A, Mead B, Hancock BW, Smith P, Qian W, Patrick P, Popova B, Pettitt A, Cunningham D, Pettengell R, et al. Randomized comparison of the stanford V regimen and ABVD in the treatment of advanced Hodgkin's Lymphoma: United Kingdom National Cancer Research Institute Lymphoma Group Study ISRCTN 64141244. *J Clin Oncol.* 2009; 27:5390–96. <https://doi.org/10.1200/JCO.2009.23.3239>. [PubMed]
  11. Carde P, Karrasch M, Fortpied C, Brice P, Khaled H, Casasnovas O, Caillot D, Gaillard I, Bologna S, Ferme C, Lugtenburg PJ, Morschhauser F, Aurer I, et al. Eight Cycles of ABVD Versus Four Cycles of BEACOPPescalated Plus Four Cycles of BEACOPPbaseline in Stage III to IV, International Prognostic Score  $\geq 3$ , High-Risk Hodgkin Lymphoma: First Results of the Phase III EORTC 20012 Intergroup Trial. *J Clin Oncol.* 2016; 34:2028–36. <https://doi.org/10.1200/JCO.2015.64.5648>. [PubMed]
  12. Merli F, Luminari S, Gobbi PG, Cascavilla N, Mammi C, Ilariucci F, Stelitano C, Musso M, Baldini L, Galimberti S, Angrilli F, Polimeno G, Scalzulli PR, et al. Long-Term Results of the HD2000 Trial Comparing ABVD Versus BEACOPP Versus COPP-EBV-CAD in Untreated Patients With Advanced Hodgkin Lymphoma: A Study by Fondazione Italiana Linfomi. *J Clin Oncol.* 2016; 34:1175–81. <https://doi.org/10.1200/JCO.2015.62.4817>. [PubMed]
  13. Fermé C, Thomas J, Brice P, Casasnovas O, Vranovsky A, Bologna S, Lugtenburg PJ, Bouabdallah R, Carde P, Sebban C, Eghbali H, Salles G, van Imhoff GW, et al. ABVD or BEACOPP(baseline) along with involved-field radiotherapy in early-stage Hodgkin Lymphoma with risk factors: Results of the European Organisation for Research and Treatment of Cancer (EORTC)-Groupe d'Étude des Lymphomes de l'Adulte (GELA) H9-U intergroup randomised trial. *Eur J Cancer.* 2017; 81:45–55. <https://doi.org/10.1016/j.ejca.2017.05.005>. [PubMed]
  14. Moskowitz CH, Nademane A, Masszi T, Agura E, Holowiecki J, Abidi MH, Chen AI, Stiff P, Gianni AM, Carella A, Osmanov D, Bachanova V, Sweetenham J, et al. Brentuximab vedotin as consolidation therapy after autologous stem-cell transplantation in patients with Hodgkin's lymphoma at risk of relapse or progression (AETHERA): a randomised, double-blind, placebo-controlled, phase 3 trial. *Lancet.* 2015; 385:1853–62. [https://doi.org/10.1016/S0140-6736\(15\)60165-9](https://doi.org/10.1016/S0140-6736(15)60165-9). [PubMed]
  15. Kuruvilla J, Ramchandren R, Santoro A, Paszkiewicz-Kozik E, Gasiorowski R, Johnson NA, Fogliatto LM, Goncalves I, de Oliveira JSR, Buccheri V, Perini GF, Goldschmidt N, Kriachok I, et al. Pembrolizumab versus brentuximab vedotin in relapsed or refractory classical Hodgkin lymphoma (KEYNOTE-204): an interim analysis of a multicentre, randomised, open-label, phase 3 study. *Lancet Oncol.* 2021; 22:512–24. [https://doi.org/10.1016/S1470-2045\(21\)00005-X](https://doi.org/10.1016/S1470-2045(21)00005-X). [PubMed]
  16. Cheson BD, Fisher RI, Barrington SF, Cavalli F, Schwartz LH, Zucca E, Lister TA, and Alliance, Australasian Leukaemia and Lymphoma Group, and Eastern Cooperative Oncology Group, and European Mantle Cell Lymphoma Consortium, and Italian Lymphoma Foundation, and European Organisation for Research, and Treatment of Cancer/Dutch Hemato-Oncology Group, Grupo Español de Médula Ósea, and German High-Grade Lymphoma Study Group, and German Hodgkin's Study Group, and Japanese Lymphoma Study Group, and Lymphoma Study Association, and NCIC Clinical Trials Group, and Nordic Lymphoma Study Group, and Southwest Oncology Group, and United Kingdom National Cancer Research Institute. Recommendations for initial evaluation, staging,

- and response assessment of Hodgkin and non-Hodgkin lymphoma: the Lugano classification. *J Clin Oncol*. 2014; 32:3059–68. <https://doi.org/10.1200/JCO.2013.54.8800>. [PubMed]
17. Linch DC, Winfield D, Goldstone AH, Moir D, Hancock B, McMillan A, Chopra R, Milligan D, Hudson GV. Dose intensification with autologous bone-marrow transplantation in relapsed and resistant Hodgkin's disease: results of a BNLI randomised trial. *Lancet*. 1993; 341:1051–54. [https://doi.org/10.1016/0140-6736\(93\)92411-1](https://doi.org/10.1016/0140-6736(93)92411-1). [PubMed]
  18. Schmitz N, Pfistner B, Sextro M, Sieber M, Carella AM, Haenel M, Boissevain F, Zschaber R, Müller P, Kirchner H, Lohri A, Decker S, Koch B, et al. Aggressive conventional chemotherapy compared with high-dose chemotherapy with autologous haemopoietic stem-cell transplantation for relapsed chemosensitive Hodgkin's disease: a randomised trial. *Lancet*. 2002; 359:2065–71. [https://doi.org/10.1016/S0140-6736\(02\)08938-9](https://doi.org/10.1016/S0140-6736(02)08938-9). [PubMed]
  19. Kuruwilla J, Nagy T, Pintilie M, Tsang R, Keating A, Crump M. Similar response rates and superior early progression-free survival with gemcitabine, dexamethasone, and cisplatin salvage therapy compared with carmustine, etoposide, cytarabine, and melphalan salvage therapy prior to autologous stem cell transplantation for recurrent or refractory Hodgkin lymphoma. *Cancer*. 2006; 106:353–60. <https://doi.org/10.1002/cncr.21587>. [PubMed]
  20. Majhail NS, Weisdorf DJ, Defor TE, Miller JS, McGlave PB, Slungaard A, Arora M, Ramsay NK, Orchard PJ, MacMillan ML, Burns LJ. Long-term results of autologous stem cell transplantation for primary refractory or relapsed Hodgkin's lymphoma. *Biol Blood Marrow Transplant*. 2006; 12:1065–72. <https://doi.org/10.1016/j.bbmt.2006.06.006>. [PubMed]
  21. Josting A, Müller H, Borchmann P, Baars JW, Metzner B, Döhner H, Aurer I, Smardova L, Fischer T, Niederwieser D, Schäfer-Eckart K, Schmitz N, Sureda A, et al. Dose intensity of chemotherapy in patients with relapsed Hodgkin's lymphoma. *J Clin Oncol*. 2010; 28:5074–80. <https://doi.org/10.1200/JCO.2010.30.5771>. [PubMed]
  22. Viviani S, Zinzani PL, Rambaldi A, Brusamolino E, Levis A, Bonfante V, Vitolo U, Pulsoni A, Liberati AM, Specchia G, Valagussa P, Rossi A, Zaja F, et al. ABVD versus BEACOPP for Hodgkin's lymphoma when high-dose salvage is planned. *N Engl J Med*. 2011; 365:203–12. <https://doi.org/10.1056/NEJMoa1100340>. [PubMed]
  23. Moore S, Kayani I, Peggs K, Qian W, Lowry L, Thomson K, Linch DC, Ardeshna K. Mini-BEAM is effective as a bridge to transplantation in patients with refractory or relapsed Hodgkin lymphoma who have failed to respond to previous lines of salvage chemotherapy but not in patients with salvage-refractory DLBCL. *Br J Haematol*. 2012; 157:543–52. <https://doi.org/10.1111/j.1365-2141.2012.09096.x>. [PubMed]
  24. Bartlett NL. Optimizing Second-Line Therapy for Hodgkin Lymphoma: A Work in Progress. *J Clin Oncol*. 2021; 39:3097–103. <https://doi.org/10.1200/JCO.21.01552>. [PubMed]
  25. Connors JM, Jurczak W, Straus DJ, Ansell SM, Kim WS, Gallamini A, Younes A, Alekseev S, Illés Á, Picardi M, Lech-Maranda E, Oki Y, Feldman T, et al. Brentuximab Vedotin with Chemotherapy for Stage III or IV Hodgkin's Lymphoma. *N Engl J Med*. 2018; 378:331–44. <https://doi.org/10.1056/NEJMoa1708984>. [PubMed]
  26. Mehta-Shah N, Bartlett NL. Management of relapsed/refractory classical Hodgkin lymphoma in transplant-ineligible patients. *Blood*. 2018; 131:1698–703. <https://doi.org/10.1182/blood-2017-09-772681>. [PubMed]
  27. Mottok A, Steidl C. Biology of classical Hodgkin lymphoma: implications for prognosis and novel therapies. *Blood*. 2018; 131:1654–65. <https://doi.org/10.1182/blood-2017-09-772632>. [PubMed]
  28. Sureda A, André M, Borchmann P, da Silva MG, Gisselbrecht C, Vassilakopoulos TP, Zinzani PL, Walewski J. Improving outcomes after autologous transplantation in relapsed/refractory Hodgkin lymphoma: a European expert perspective. *BMC Cancer*. 2020; 20:1088. <https://doi.org/10.1186/s12885-020-07561-2>. [PubMed]
  29. Epperla N, Herrera AF. How I incorporate novel agents into the treatment of classical Hodgkin lymphoma. *Blood*. 2021; 138:520–30. <https://doi.org/10.1182/blood.2020007900>. [PubMed]
  30. Othman T, Herrera A, Mei M. Emerging Therapies in Relapsed and Refractory Hodgkin Lymphoma: What Comes Next After Brentuximab Vedotin and PD-1 Inhibition? *Curr Hematol Malig Rep*. 2021; 16:1–7. <https://doi.org/10.1007/s11899-020-00603-3>. [PubMed]
  31. Vellemans H, André MPE. Review of Treatment Options for the Management of Advanced Stage Hodgkin Lymphoma. *Cancers (Basel)*. 2021; 13:3745. <https://doi.org/10.3390/cancers13153745>. [PubMed]
  32. Siegel RL, Miller KD, Fuchs HE, Jemal A. Cancer Statistics, 2021. *CA Cancer J Clin*. 2021; 71:7–33. <https://doi.org/10.3322/caac.21654>. [PubMed]
  33. Sung H, Ferlay J, Siegel RL, Laversanne M, Soerjomataram I, Jemal A, Bray F. Global Cancer Statistics 2020: GLOBOCAN Estimates of Incidence and Mortality Worldwide for 36 Cancers in 185 Countries. *CA Cancer J Clin*. 2021; 71:209–49. <https://doi.org/10.3322/caac.21660>. [PubMed]
  34. Brasil. Instituto Nacional de Câncer José Alencar Gomes da Silva. Estimativa 2020 : incidência de câncer no Brasil. Rio de Janeiro: INCA, 2019. Available at <https://www.inca.gov.br/sites/ufu.sti.inca.local/files/media/document/estimativa-2020-incidencia-de-cancer-no-brasil.pdf> (Accessed 25 January 2022).
  35. Biasoli I, Castro N, Delamain M, Silveira T, Farley J, Pinto Simões B, Solza C, Praxedes M, Baiocchi O, Gaiolla R, Franceschi F, Bonamin Sola C, Boquimpani C, et al. Lower socioeconomic status is independently associated with shorter survival in Hodgkin Lymphoma patients-An

- analysis from the Brazilian Hodgkin Lymphoma Registry. *Int J Cancer*. 2018; 142:883–90. <https://doi.org/10.1002/ijc.31096>. [PubMed]
36. Spector N, Costa MA, Morais JC, Biasoli I, Solza C, De Fatima Gauí M, Ferreira CG, Portugal RD, Loureiro M, Nucci M, Pulcheri W. Intensified ABVP chemotherapy for the primary treatment of Hodgkin's disease. *Oncol Rep*. 2002; 9:439–42. [PubMed]
  37. Viani GA, Castilho MS, Novaes PE, Antonelli CG, Ferrigno R, Pellizzon CA, Fogaroli RC, Conte MA, Salvajoli JV. Chemotherapy followed by low dose radiotherapy in childhood Hodgkin's disease: retrospective analysis of results and prognostic factors. *Radiat Oncol*. 2006; 1:38. <https://doi.org/10.1186/1748-717X-1-38>. [PubMed]
  38. Hsu SC, Metzger ML, Hudson MM, Pedrosa F, Lins M, Pedrosa M, Barros C, Maciel K, Pui CH, Ribeiro RC, Howard SC. Comparison of treatment outcomes of childhood Hodgkin lymphoma in two US centers and a center in Recife, Brazil. *Pediatr Blood Cancer*. 2007; 49:139–44. <https://doi.org/10.1002/pbc.20883>. [PubMed]
  39. Spector N, Costa MA, Pulcheri W, Salgado RC, Nucci M, Andrade CA, de Morais JC, de Castro O, Scaletsky AF, Brabo E. C-MOPP/ABV yields good results in a public hospital population with Hodgkin disease in Brazil. *Cancer*. 1993; 71:2823–27. [https://doi.org/10.1002/1097-0142\(19930501\)71:9%3c2823::aid-cncr2820710923%3e3.0.co;2-6](https://doi.org/10.1002/1097-0142(19930501)71:9%3c2823::aid-cncr2820710923%3e3.0.co;2-6). [PubMed]
  40. Parikh RR, Grossbard ML, Harrison LB, Yahalom J. Impact of delays in definitive treatment on overall survival: a National Cancer Database study of patients with Hodgkin lymphoma. *Leuk Lymphoma*. 2016; 57:1074–82. <https://doi.org/10.3109/10428194.2015.1094696>. [PubMed]
  41. Eichenauer DA, Aleman BMP, André M, Federico M, Hutchings M, Illidge T, Engert A, Ladetto M, and ESMO Guidelines Committee. Hodgkin lymphoma: ESMO Clinical Practice Guidelines for diagnosis, treatment and follow-up. *Ann Oncol*. 2018; 29:iv19–29. <https://doi.org/10.1093/annonc/mdy080>. [PubMed]
  42. Renna Junior NL, Lima CA, Laporte CA, Coleman MP, de Azevedo E Silva G. Ethnic, racial and socioeconomic disparities in breast cancer survival in two Brazilian capitals between 1996 and 2012. *Cancer Epidemiol*. 2021; 75:102048. <https://doi.org/10.1016/j.canep.2021.102048>. [PubMed]
  43. Oliveira NPD, Santos Siqueira CAD, Lima KYN, de Camargo Cancela M, Souza DLB. Association of cervical and breast cancer mortality with socioeconomic indicators and availability of health services. *Cancer Epidemiol*. 2020; 64:101660. <https://doi.org/10.1016/j.canep.2019.101660>. [PubMed]
  44. Alcaraz KI, Wiedt TL, Daniels EC, Yabroff KR, Guerra CE, Wender RC. Understanding and addressing social determinants to advance cancer health equity in the United States: A blueprint for practice, research, and policy. *CA Cancer J Clin*. 2020; 70:31–46. <https://doi.org/10.3322/caac.21586>. [PubMed]
  45. Keegan TH, DeRouen MC, Parsons HM, Clarke CA, Goldberg D, Flowers CR, Glaser SL. Impact of Treatment and Insurance on Socioeconomic Disparities in Survival after Adolescent and Young Adult Hodgkin Lymphoma: A Population-Based Study. *Cancer Epidemiol Biomarkers Prev*. 2016; 25:264–73. <https://doi.org/10.1158/1055-9965.EPI-15-0756>. [PubMed]
  46. Parikh RR, Grossbard ML, Green BL, Harrison LB, Yahalom J. Disparities in survival by insurance status in patients with Hodgkin lymphoma. *Cancer*. 2015; 121:3515–24. <https://doi.org/10.1002/cncr.29518>. [PubMed]
  47. Soares A, Biasoli I, Scheliga A, Luiz RR, Costa MA, Land M, Romano S, Morais JC, Spector N. Socioeconomic inequality and short-term outcome in Hodgkin's lymphoma. *Int J Cancer*. 2007; 120:875–79. <https://doi.org/10.1002/ijc.22417>. [PubMed]
  48. Goyal G, Tella SH, Funni S, Kommalapati A, Inselman JW, Shah ND, Go RS, Ansell SM. Association between facility volume and mortality of patients with classic Hodgkin lymphoma. *Cancer*. 2020; 126:757–64. <https://doi.org/10.1002/cncr.32584>. [PubMed]
  49. Younes A, Connors JM, Park SI, Fanale M, O'Meara MM, Hunder NN, Huebner D, Ansell SM. Brentuximab vedotin combined with ABVD or AVD for patients with newly diagnosed Hodgkin's lymphoma: a phase I, open-label, dose-escalation study. *Lancet Oncol*. 2013; 14:1348–56. [https://doi.org/10.1016/S1470-2045\(13\)70501-1](https://doi.org/10.1016/S1470-2045(13)70501-1). [PubMed]
  50. Straus DJ, Długosz-Danecka M, Connors JM, Alekseev S, Illés Á, Picardi M, Lech-Maranda E, Feldman T, Smolewski P, Savage KJ, Bartlett NL, Walewski J, Ramchandren R, et al. Brentuximab vedotin with chemotherapy for stage III or IV classical Hodgkin lymphoma (ECHELON-1): 5-year update of an international, open-label, randomised, phase 3 trial. *Lancet Haematol*. 2021; 8:e410–21. [https://doi.org/10.1016/S2352-3026\(21\)00102-2](https://doi.org/10.1016/S2352-3026(21)00102-2). [PubMed]
  51. Ansell SM, Radford J, Connors JM, Długosz-Danecka M, Kim WS, Gallamini A, Ramchandren R, Friedberg JW, Advani R, Hutchings M, Evens AM, Smolewski P, Savage KJ, et al. Overall Survival with Brentuximab Vedotin in Stage III or IV Hodgkin's Lymphoma. *N Engl J Med*. 2022; 387:310–20. <https://doi.org/10.1056/NEJMoa2206125>. [PubMed]
  52. National Comprehensive Cancer Network. NCCN Practice Guidelines in Oncology. Hodgkin Lymphoma – v.1.2022. Available at [http://www.nccn.org/professionals/physician\\_gls/PDF/hogkins.pdf](http://www.nccn.org/professionals/physician_gls/PDF/hogkins.pdf) (Accessed on 10 January 2022).
  53. Bröckelmann PJ, Goergen H, Keller U, Meissner J, Ordemann R, Halbsguth TV, Sasse S, Sökler M, Kerkhoff A, Mathas S, Hüttmann A, Bormann M, Zimmermann A, et al. Efficacy of Nivolumab and AVD in Early-Stage Unfavorable Classic Hodgkin Lymphoma: The Randomized Phase 2 German Hodgkin Study Group NIVAHL Trial.

- JAMA Oncol. 2020; 6:872–80. <https://doi.org/10.1001/jamaoncol.2020.0750>. [PubMed]
54. Ramchandren R, Domingo-Domènech E, Rueda A, Trněný M, Feldman TA, Lee HJ, Provencio M, Sillaber C, Cohen JB, Savage KJ, Willenbacher W, Ligon AH, Ouyang J, et al. Nivolumab for Newly Diagnosed Advanced-Stage Classic Hodgkin Lymphoma: Safety and Efficacy in the Phase II CheckMate 205 Study. *J Clin Oncol*. 2019; 37:1997–2007. <https://doi.org/10.1200/JCO.19.00315>. [PubMed]
  55. Allen PB, Savas H, Evens AM, Advani RH, Palmer B, Pro B, Karmali R, Mou E, Bearden J, Dillehay G, Bayer RA, Eisner RM, Chmiel JS, et al. Pembrolizumab followed by AVD in untreated early unfavorable and advanced-stage classical Hodgkin lymphoma. *Blood*. 2021; 137:1318–26. <https://doi.org/10.1182/blood.2020007400>. [PubMed]
  56. Moxley JH 3rd, De Vita VT, Brace K, Frei E 3rd. Intensive combination chemotherapy and X-irradiation in Hodgkin's disease. *Cancer Res*. 1967; 27:1258–63. [PubMed]
  57. Younes A, Gopal AK, Smith SE, Ansell SM, Rosenblatt JD, Savage KJ, Ramchandren R, Bartlett NL, Cheson BD, de Vos S, Forero-Torres A, Moskowitz CH, Connors JM, et al. Results of a pivotal phase II study of brentuximab vedotin for patients with relapsed or refractory Hodgkin's lymphoma. *J Clin Oncol*. 2012; 30:2183–89. <https://doi.org/10.1200/JCO.2011.38.0410>. [PubMed]
  58. Gopal AK, Chen R, Smith SE, Ansell SM, Rosenblatt JD, Savage KJ, Connors JM, Engert A, Larsen EK, Chi X, Sievers EL, Younes A. Durable remissions in a pivotal phase 2 study of brentuximab vedotin in relapsed or refractory Hodgkin lymphoma. *Blood*. 2015; 125:1236–43. <https://doi.org/10.1182/blood-2014-08-595801>. [PubMed]
  59. Chen R, Gopal AK, Smith SE, Ansell SM, Rosenblatt JD, Savage KJ, Connors JM, Engert A, Larsen EK, Huebner D, Fong A, Younes A. Five-year survival and durability results of brentuximab vedotin in patients with relapsed or refractory Hodgkin lymphoma. *Blood*. 2016; 128:1562–66. <https://doi.org/10.1182/blood-2016-02-699850>. [PubMed]
  60. Gopal AK, Ramchandren R, O'Connor OA, Berryman RB, Advani RH, Chen R, Smith SE, Cooper M, Rothe A, Matous JV, Grove LE, Zain J. Safety and efficacy of brentuximab vedotin for Hodgkin lymphoma recurring after allogeneic stem cell transplantation. *Blood*. 2012; 120:560–68. <https://doi.org/10.1182/blood-2011-12-397893>. [PubMed]
  61. Bartlett NL, Chen R, Fanale MA, Brice P, Gopal A, Smith SE, Advani R, Matous JV, Ramchandren R, Rosenblatt JD, Huebner D, Levine P, Grove L, Forero-Torres A. Retreatment with brentuximab vedotin in patients with CD30-positive hematologic malignancies. *J Hematol Oncol*. 2014; 7:24. <https://doi.org/10.1186/1756-8722-7-24>. [PubMed]
  62. Moskowitz CH, Walewski J, Nademane A, Masszi T, Agura E, Holowiecki J, Abidi MH, Chen AI, Stiff P, Viviani S, Bachanova V, Sureda A, McClendon T, et al. Five-year PFS from the AETHERA trial of brentuximab vedotin for Hodgkin lymphoma at high risk of progression or relapse. *Blood*. 2018; 132:2639–42. <https://doi.org/10.1182/blood-2018-07-861641>. [PubMed]
  63. Broccoli A, Argnani L, Botto B, Corradini P, Pinto A, Re A, Vitolo U, Fanti S, Stefoni V, Zinzani PL, Fondazione Italiana Linfomi ONLUS. First salvage treatment with bendamustine and brentuximab vedotin in Hodgkin lymphoma: a phase 2 study of the Fondazione Italiana Linfomi. *Blood Cancer J*. 2019; 9:100. <https://doi.org/10.1038/s41408-019-0265-x>. [PubMed]
  64. O'Connor OA, Lue JK, Sawas A, Amengual JE, Deng C, Kalac M, Falchi L, Marchi E, Turenne I, Lichtenstein R, Rojas C, Francescone M, Schwartz L, et al. Brentuximab vedotin plus bendamustine in relapsed or refractory Hodgkin's lymphoma: an international, multicentre, single-arm, phase 1-2 trial. *Lancet Oncol*. 2018; 19:257–66. [https://doi.org/10.1016/S1470-2045\(17\)30912-9](https://doi.org/10.1016/S1470-2045(17)30912-9). [PubMed]
  65. LaCasce AS, Bociek RG, Sawas A, Caimi P, Agura E, Matous J, Ansell SM, Crosswell HE, Islas-Ohlmayer M, Behler C, Cheung E, Forero-Torres A, Vose J, et al. Brentuximab vedotin plus bendamustine: a highly active first salvage regimen for relapsed or refractory Hodgkin lymphoma. *Blood*. 2018; 132:40–48. <https://doi.org/10.1182/blood-2017-11-815183>. [PubMed]
  66. Lynch RC, Cassaday RD, Smith SD, Fromm JR, Cowan AJ, Warren EH, Shadman MS, Shustov A, Till BG, Ujjani CS, Libby EN 3rd, Philip M, Coye H, et al. Dose-dense brentuximab vedotin plus ifosfamide, carboplatin, and etoposide for second-line treatment of relapsed or refractory classical Hodgkin lymphoma: a single centre, phase 1/2 study. *Lancet Haematol*. 2021; 8:e562–71. [https://doi.org/10.1016/S2352-3026\(21\)00170-8](https://doi.org/10.1016/S2352-3026(21)00170-8). [PubMed]
  67. Kersten MJ, Driessen J, Zijlstra JM, Plattel WJ, Morschhauser F, Lugtenburg PJ, Brice P, Hutchings M, Gastinne T, Liu R, Burggraaff CN, Nijland M, Tonino SH, et al. Combining brentuximab vedotin with dexamethasone, high-dose cytarabine and cisplatin as salvage treatment in relapsed or refractory Hodgkin lymphoma: the phase II HOVON/LLPC Transplant BRAVE study. *Haematologica*. 2021; 106:1129–37. <https://doi.org/10.3324/haematol.2019.243238>. [PubMed]
  68. Garcia-Sanz R, Sureda A, de la Cruz F, Canales M, Gonzalez AP, Pinana JL, Rodriguez A, Gutierrez A, Domingo-Domenech E, Sanchez-Gonzalez B, Rodriguez G, Lopez J, Moreno M, et al. Brentuximab vedotin and ESHAP is highly effective as second-line therapy for Hodgkin lymphoma patients (long-term results of a trial by the Spanish GELTAMO Group). *Ann Oncol*. 2019; 30:612–20. <https://doi.org/10.1093/annonc/mdz009>. [PubMed]
  69. LaCasce AS, Bociek RG, Sawas A, Caimi P, Agura E, Matous J, Ansell SM, Crosswell HE, Islas-Ohlmayer M, Behler C, Cheung E, Forero-Torres A, Vose J, et al. Three-year outcomes with brentuximab vedotin plus bendamustine as first salvage therapy in relapsed or refractory Hodgkin lymphoma. *Br J Haematol*. 2020; 189:e86–90. <https://doi.org/10.1111/bjh.16499>. [PubMed]

70. Desai S, Wang Y, Rosenthal AC, Reeder CB, Inwards DJ, Ayala E, Nowakowski GS, Tun H, Paludo J, Villasboas JC, Porrata LF, Moustafa MA, Kharfan-Dabaja M, et al. Salvage therapies in transplant-eligible relapsed classic Hodgkin lymphoma, are novel regimens better? *J Clin Oncol*. 2021 (Suppl 15); 39:7530. [https://doi.org/10.1200/JCO.2021.39.15\\_suppl.7530](https://doi.org/10.1200/JCO.2021.39.15_suppl.7530).
71. Radhakrishnan VS, Bajaj R, Raina V, Kumar J, Bhav SJ, Sukumaran Nair RK, Nag A, Arun I, Zameer L, Dey D, Arora N, Parihar M, Das J, et al. Relapsed Refractory Hodgkin Lymphoma and Brentuximab Vedotin-Bendamustine Combination Therapy as a Bridge to Transplantation: Real-World Evidence From a Middle-Income Setting and Literature Review. *Front Oncol*. 2021; 11:796270. <https://doi.org/10.3389/fonc.2021.796270>. [PubMed]
72. Armand P, Shipp MA, Ribrag V, Michot JM, Zinzani PL, Kuruvilla J, Snyder ES, Ricart AD, Balakumaran A, Rose S, Moskowitz CH. Programmed Death-1 Blockade With Pembrolizumab in Patients With Classical Hodgkin Lymphoma After Brentuximab Vedotin Failure. *J Clin Oncol*. 2016; 34:3733–39. <https://doi.org/10.1200/JCO.2016.67.3467>. [PubMed]
73. Chen R, Zinzani PL, Fanale MA, Armand P, Johnson NA, Brice P, Radford J, Ribrag V, Molin D, Vassilakopoulos TP, Tomita A, von Tresckow B, Shipp MA, et al. Phase II Study of the Efficacy and Safety of Pembrolizumab for Relapsed/Refractory Classic Hodgkin Lymphoma. *J Clin Oncol*. 2017; 35:2125–32. <https://doi.org/10.1200/JCO.2016.72.1316>. [PubMed]
74. Ansell SM, Lesokhin AM, Borrello I, Halwani A, Scott EC, Gutierrez M, Schuster SJ, Millenson MM, Cattry D, Freeman GJ, Rodig SJ, Chapuy B, Ligon AH, et al. PD-1 blockade with nivolumab in relapsed or refractory Hodgkin's lymphoma. *N Engl J Med*. 2015; 372:311–19. <https://doi.org/10.1056/NEJMoa1411087>. [PubMed]
75. Armand P, Engert A, Younes A, Fanale M, Santoro A, Zinzani PL, Timmerman JM, Collins GP, Ramchandren R, Cohen JB, De Boer JP, Kuruvilla J, Savage KJ, et al. Nivolumab for Relapsed/Refractory Classic Hodgkin Lymphoma After Failure of Autologous Hematopoietic Cell Transplantation: Extended Follow-Up of the Multicohort Single-Arm Phase II CheckMate 205 Trial. *J Clin Oncol*. 2018; 36:1428–39. <https://doi.org/10.1200/JCO.2017.76.0793>. [PubMed]
76. Armand P, Chen YB, Redd RA, Joyce RM, Bsai J, Jeter E, Merryman RW, Coleman KC, Dahi PB, Nieto Y, LaCasce AS, Fisher DC, Ng SY, et al. PD-1 blockade with pembrolizumab for classical Hodgkin lymphoma after autologous stem cell transplantation. *Blood*. 2019; 134:22–29. <https://doi.org/10.1182/blood.2019000215>. [PubMed]
77. Younes A, Santoro A, Shipp M, Zinzani PL, Timmerman JM, Ansell S, Armand P, Fanale M, Ratanatharathorn V, Kuruvilla J, Cohen JB, Collins G, Savage KJ, et al. Nivolumab for classical Hodgkin's lymphoma after failure of both autologous stem-cell transplantation and brentuximab vedotin: a multicentre, multicohort, single-arm phase 2 trial. *Lancet Oncol*. 2016; 17:1283–94. [https://doi.org/10.1016/S1470-2045\(16\)30167-X](https://doi.org/10.1016/S1470-2045(16)30167-X). [PubMed]
78. Herbaux C, Gauthier J, Brice P, Drumez E, Ysebaert L, Doyen H, Fornecker L, Bouabdallah K, Manson G, Ghesquières H, Tabrizi R, Hermet E, Lazarovici J, et al. Efficacy and tolerability of nivolumab after allogeneic transplantation for relapsed Hodgkin lymphoma. *Blood*. 2017; 129:2471–78. <https://doi.org/10.1182/blood-2016-11-749556>. [PubMed]
79. Advani RH, Moskowitz AJ, Bartlett NL, Vose JM, Ramchandren R, Feldman TA, LaCasce AS, Christian BA, Ansell SM, Moskowitz CH, Brown L, Zhang C, Taft D, et al. Brentuximab vedotin in combination with nivolumab in relapsed or refractory Hodgkin lymphoma: 3-year study results. *Blood*. 2021; 138:427–38. <https://doi.org/10.1182/blood.2020009178>. [PubMed]
80. Plattel WJ, Bergamasco A, Trinchese F, Gavini F, Bent-Ennakhil N, Zomas A, Castillon G, Arredondo-Bisono T, Cristarella T, Moride Y, von Tresckow B. Effectiveness of brentuximab vedotin monotherapy in relapsed or refractory Hodgkin lymphoma: a systematic review and meta-analysis. *Leuk Lymphoma*. 2021; 62:3320–32. <https://doi.org/10.1080/010428194.2021.1957865>. [PubMed]
81. Zinzani PL, Sasse S, Radford J, Shonukan O, Bonthapally V. Experience of brentuximab vedotin in relapsed/refractory Hodgkin lymphoma and relapsed/refractory systemic anaplastic large-cell lymphoma in the Named Patient Program: Review of the literature. *Crit Rev Oncol Hematol*. 2015; 95:359–69. <https://doi.org/10.1016/j.critrevonc.2015.03.011>. [PubMed]
82. Zinzani PL, Sasse S, Radford J, Gautam A, Bonthapally V. Brentuximab vedotin in relapsed/refractory Hodgkin lymphoma: An updated review of published data from the named patient program. *Crit Rev Oncol Hematol*. 2016; 104:65–70. <https://doi.org/10.1016/j.critrevonc.2016.04.019>. [PubMed]
83. Gandolfi L, Pellegrini C, Casadei B, Stefoni V, Broccoli A, Tonialini L, Morigi A, Argnani L, Zinzani PL. Long-Term Responders After Brentuximab Vedotin: Single-Center Experience on Relapsed and Refractory Hodgkin Lymphoma and Anaplastic Large Cell Lymphoma Patients. *Oncologist*. 2016; 21:1436–41. <https://doi.org/10.1634/theoncologist.2016-0112>. [PubMed]
84. Pellegrini C, Broccoli A, Pulsoni A, Rigacci L, Patti C, Gini G, Mannina D, Tani M, Rusconi C, Romano A, Vanazzi A, Botto B, Santoro A, et al. Italian real life experience with brentuximab vedotin: results of a large observational study on 234 relapsed/refractory Hodgkin's lymphoma. *Oncotarget*. 2017; 8:91703–10. <https://doi.org/10.18632/oncotarget.18114>. [PubMed]
85. Král Z, Michalka J, Móciková H, Marková J, Sýkorová A, Belada D, Jungová A, Vokurka S, Lukášová M, Procházka V, Ďuraš J, Hájek R, Dušek L, et al. Treatment of Relapsed/

- Refractory Hodgkin Lymphoma: Real-World Data from the Czech Republic and Slovakia. *J Cancer*. 2019; 10:5041–48. <https://doi.org/10.7150/jca.29308>. [PubMed]
86. Bröckelmann PJ, Zagadailov EA, Corman SL, Chirikov V, Johnson C, Macahilig C, Seal B, Dalal MR, Illidge T. Brentuximab vedotin in patients with relapsed or refractory Hodgkin lymphoma who are Ineligible for autologous stem cell transplant: A Germany and United Kingdom retrospective study. *Eur J Haematol*. 2017; 99:553–58. <https://doi.org/10.1111/ejh.12973>. [PubMed]
  87. Collins GP, Rueda A, Salles G, von Tresckow B, Zaja F. Management of Hodgkin lymphoma in the era of brentuximab vedotin: real-world data from five European countries. *Leuk Lymphoma*. 2018; 59:2113–20. <https://doi.org/10.1080/10428194.2017.1421762>. [PubMed]
  88. Pavone V, Mele A, Carlino D, Specchia G, Gaudio F, Perrone T, Mazza P, Palazzo G, Guarini A, Loseto G, Eleonora P, Cascavilla N, Scalzulli P, et al. Brentuximab vedotin as salvage treatment in Hodgkin lymphoma naïve transplant patients or failing ASCT: the real life experience of Rete Ematologica Pugliese (REP). *Ann Hematol*. 2018; 97:1817–24. <https://doi.org/10.1007/s00277-018-3379-5>. [PubMed]
  89. Gibb A, Jones C, Bloor A, Kulkarni S, Illidge T, Linton K, Radford J. Brentuximab vedotin in refractory CD30+ lymphomas: a bridge to allogeneic transplantation in approximately one quarter of patients treated on a Named Patient Programme at a single UK center. *Haematologica*. 2013; 98:611–14. <https://doi.org/10.3324/haematol.2012.069393>. [PubMed]
  90. Eyre TA, Phillips EH, Linton KM, Arumainathan A, Kassam S, Gibb A, Allibone S, Radford J, Peggs K, Burton C, Stewart G, LeDieu R, Booth C, et al. Results of a multicentre UK-wide retrospective study evaluating the efficacy of brentuximab vedotin in relapsed, refractory classical Hodgkin lymphoma in the transplant naïve setting. *Br J Haematol*. 2017; 179:471–79. <https://doi.org/10.1111/bjh.14898>. [PubMed]
  91. Shah GL, Moskowitz CH. Transplant strategies in relapsed/refractory Hodgkin lymphoma. *Blood*. 2018; 131:1689–97. <https://doi.org/10.1182/blood-2017-09-772673>. [PubMed]
  92. Walewski J, Hellmann A, Siritanaratkul N, Ozsan GH, Ozcan M, Chuncharunee S, Goh AS, Jurczak W, Koren J, Paszkiewicz-Kozik E, Wang B, Singh S, Huebner D, et al. Prospective study of brentuximab vedotin in relapsed/refractory Hodgkin lymphoma patients who are not suitable for stem cell transplant or multi-agent chemotherapy. *Br J Haematol*. 2018; 183:400–10. <https://doi.org/10.1111/bjh.15539>. [PubMed]
  93. Akay OM, Ozbalak M, Pehlivan M, Yildiz B, Uzay A, Yigenoglu TN, Elverdi T, Kaynar L, Ayyildiz O, Yonal Hindilerden I, Goksoy HS, Izmir Guner S, Gunes AK, et al. Brentuximab vedotin consolidation therapy after autologous stem-cell transplantation in patients with high-risk Hodgkin lymphoma: Multicenter retrospective study. *Hematol Oncol*. 2021; 39:498–505. <https://doi.org/10.1002/hon.2897>. [PubMed]
  94. Massaro F, Pavone V, Stefani PM, Botto B, Pulsoni A, Patti C, Cantonetti M, Visentin A, Scalzulli PR, Rossi A, Galimberti S, Cimminiello M, Gini G, et al. Brentuximab vedotin consolidation after autologous stem cell transplantation for Hodgkin lymphoma: A Fondazione Italiana Linfomi real-life experience. *Hematol Oncol*. 2022; 40:31–39. <https://doi.org/10.1002/hon.2939>. [PubMed]
  95. Zagadailov EA, Corman S, Chirikov V, Johnson C, Macahilig C, Seal B, Dalal MR, Bröckelmann PJ, Illidge T. Real-world effectiveness of brentuximab vedotin versus physicians' choice chemotherapy in patients with relapsed/refractory Hodgkin lymphoma following autologous stem cell transplantation in the United Kingdom and Germany. *Leuk Lymphoma*. 2018; 59:1413–19. <https://doi.org/10.1080/10428194.2017.1382698>. [PubMed]
  96. Beköz H, Karadurmuş N, Paydaş S, Türker A, Toptaş T, Fıratlı Tuğlular T, Sönmez M, Gülbaş Z, Tekgündüz E, Kaya AH, Özbalak M, Taştımır N, Kaynar L, et al. Nivolumab for relapsed or refractory Hodgkin lymphoma: real-life experience. *Ann Oncol*. 2017; 28:2496–502. <https://doi.org/10.1093/annonc/mdx341>. [PubMed]
  97. Bekoz H, Ozbalak M, Karadurmus N, Paydas S, Turker A, Toptaş T, Tuğlular TF, Altuntas F, Cakar MK, Sonmez M, Gulbas Z, Demir N, Kaynar L, et al. Nivolumab for relapsed or refractory Hodgkin lymphoma: real-life experience. *Ann Hematol*. 2020; 99:2565–76. <https://doi.org/10.1007/s00277-020-04077-4>. [PubMed]
  98. Schoch LK, Cooke KR, Wagner-Johnston ND, Gojo I, Swinnen LJ, Imus P, Fuchs EJ, Levis M, Ambinder RF, Jones RJ, Gladstone DE. Immune checkpoint inhibitors as a bridge to allogeneic transplantation with posttransplant cyclophosphamide. *Blood Adv*. 2018; 2:2226–29. <https://doi.org/10.1182/bloodadvances.2018019208>. [PubMed]
  99. Martínez C, Carpio C, Heras I, Ríos-Herranz E, Buch J, Gutierrez A, Romero S, Zeberio I, García-García I, Rodríguez-Izquierdo A, Alonso R, Bargay J, Barrenetxea C, et al. Potential Survival Benefit for Patients Receiving Allogeneic Hematopoietic Stem Cell Transplantation after Nivolumab Therapy for Relapse/Refractory Hodgkin Lymphoma: Real-Life Experience in Spain. *Biol Blood Marrow Transplant*. 2020; 26:1534–42. <https://doi.org/10.1016/j.bbmt.2020.02.003>. [PubMed]
  100. Bair SM, Strelec LE, Feldman TA, Ahmed G, Armand P, Shah NN, Singavi AN, Reddy N, Khan N, Andreadis C, Vu K, Huntington SF, Giri S, et al. Outcomes and Toxicities of Programmed Death-1 (PD-1) Inhibitors in Hodgkin Lymphoma Patients in the United States: A Real-World, Multicenter Retrospective Analysis. *Oncologist*. 2019; 24:955–62. <https://doi.org/10.1634/theoncologist.2018-0538>. [PubMed]
  101. Momotow J, Bühnen I, Trautmann-Grill K, Kobbe G, Wilhelm M, Heinrich B, Gaska T, Forstbauer H, Schmidt B, Hüttmann A, Heil G, Kraemer DM, Krüger WH,



- et al. Outcomes of Anti-PD1 Treatment for Relapsed/Refractory Hodgkin Lymphoma: A German Hodgkin Study Group (GHSg) Multi-Center Real-World Analysis. *Blood*. 2021; 138:4533. <https://doi.org/10.1182/blood-2021-153200>.
102. Fatobene G, Linardi CDCG, Moreira F, Targueta GMF, Santos FM, Velasques RD, Rocha V, Buccheri V. Reassessment of risk factors and long-term results of autologous stem cell transplantation in relapsed and refractory classical Hodgkin lymphoma. *Hematol Oncol*. 2019; 37:310–13. <https://doi.org/10.1002/hon.2604>. [PubMed]
  103. Buccheri V, Fatobene G, Santos FM, Velasques RD, Belleso M, Atanazio MJ, Rocha V. Rescue of chemorefractory classical Hodgkin lymphoma with nivolumab and autologous stem-cell transplantation: Real-life experience. *Hematol Oncol*. 2021; 39:134–36. <https://doi.org/10.1002/hon.2796>. [PubMed]
  104. Duarte FB, Fernandes MG, Kaufmann J, Barroso KS, Leitão JP, Araujo BS, Costa CM, Quixadá-Medica AT, Holanda JS, Landim SV, Pitombeira MH. Hodgkin's Lymphoma - evaluation of patients submitted to Autologous transplantation of hematopoietic cells in the Hematology Service of the Hospital Walter Cantídio - Fortaleza, Brazil. *Rev Assoc Med Bras (1992)*. 2016 (Suppl 1); 62:34–38. <https://doi.org/10.1590/1806-9282.62.suppl1.34>. [PubMed]
  105. Cortez AJ, Dulley FL, Saboya R, Mendrone Júnior A, Amigo Filho U, Coracin FL, Buccheri V, Linardi Cda C, Ruiz MA, Chamone Dde A. Autologous hematopoietic stem cell transplantation in classical Hodgkin's lymphoma. *Rev Bras Hematol Hemoter*. 2011; 33:10–14. <https://doi.org/10.5581/1516-8484.20110007>. [PubMed]
  106. Duarte BK, Valente I, Vigorito AC, Aranha FJ, Oliveira-Duarte G, Miranda EC, Lorand-Metze I, Pagnano KB, Delamain M, Marques Junior JF, Brandalise SR, Nucci M, De Souza CA. Brazilian experience using high-dose sequential chemotherapy followed by autologous hematopoietic stem cell transplantation for relapsed or refractory Hodgkin lymphoma. *Clin Lymphoma Myeloma*. 2009; 9:449–54. <https://doi.org/10.3816/CLM.2009.n.088>. [PubMed]
  107. Zinzani PL, Tani M, Gabriele A, Gherlinzoni F, de Vivo A, Ricci P, Bandini G, Lemoli RM, Motta MR, Rizzi S, Giudice V, Zompatori M, Stefoni V, et al. High-dose therapy with autologous transplantation for Hodgkin's disease: the Bologna experience. *Haematologica*. 2003; 88:522–28. [PubMed]
  108. Cocorocchio E, Peccatori F, Vanazzi A, Piperno G, Calabrese L, Botteri E, Travaini L, Preda L, Martinelli G. High-dose chemotherapy in relapsed or refractory Hodgkin lymphoma patients: a reappraisal of prognostic factors. *Hematol Oncol*. 2013; 31:34–40. <https://doi.org/10.1002/hon.2014>. [PubMed]
  109. Lacerda MP, Arrais Rodrigues C, Pereira AD, Novis Y, Fonseca M, Silva RL, Macedo MCMA, Hamerschlak N, Esteves I, Schmidt Filho J, Nascimento MM, Rocha V. Human Leukocyte Antigen-Haploidentical Transplantation for Relapsed/Refractory Hodgkin Lymphoma: A Multicenter Analysis. *Biol Blood Marrow Transplant*. 2017; 23:705–707. <https://doi.org/10.1016/j.bbmt.2017.01.079>. [PubMed]
  110. Lopes LC, Barberato-Filho S, Costa AC, Osorio-de-Castro CG. Rational use of anticancer drugs and patient lawsuits in the state of São Paulo, Southeastern Brazil. *Rev Saude Publica*. 2010; 44:620–28. <https://doi.org/10.1590/s0034-89102010000400005>. [PubMed]
  111. Brasil. Instituto Brasileiro de Geografia e Estatística. Pesquisa Nacional de Saúde, 2019. Informações sobre domicílios, acesso e utilização dos serviços de saúde. Available at <https://biblioteca.ibge.gov.br/visualizacao/livros/liv101748.pdf> (Accessed 29 January 2022).
  112. Yamauti SM, Barreto JOM, Barberato-Filho S, Lopes LC. Strategies Implemented by Public Institutions to Approach the Judicialization of Health Care in Brazil: A Systematic Scoping Review. *Front Pharmacol*. 2020; 11:1128. <https://doi.org/10.3389/fphar.2020.01128>. [PubMed]
  113. Brasil. Ministério da Saúde. Protocolo Clínico e Diretrizes Terapêuticas Linfoma de Hodgkin no Adulto. Available at [http://conitec.gov.br/images/Protocolos/20201230\\_PCDT\\_Linfoma-de-Hodgkin.pdf](http://conitec.gov.br/images/Protocolos/20201230_PCDT_Linfoma-de-Hodgkin.pdf) (Accessed 28 January 2022).
  114. Kelly KM. Hodgkin lymphoma in children and adolescents: improving the therapeutic index. *Blood*. 2015; 126:2452–58. <https://doi.org/10.1182/blood-2015-07-641035>. [PubMed]
  115. Bröckelmann PJ, Sasse S, Engert A. Balancing risk and benefit in early-stage classical Hodgkin lymphoma. *Blood*. 2018; 131:1666–78. <https://doi.org/10.1182/blood-2017-10-772665>. [PubMed]
  116. Bröckelmann PJ, McMullen S, Wilson JB, Mueller K, Goring S, Stamatoullas A, Zagadailov E, Gautam A, Huebner D, Dalal M, Illidge T. Patient and physician preferences for first-line treatment of classical Hodgkin lymphoma in Germany, France and the United Kingdom. *Br J Haematol*. 2019; 184:202–14. <https://doi.org/10.1111/bjh.15566>. [PubMed]
  117. Khan N, Feliciano J, Müller K, He M, Tao R, Korol E, Dalal M, Rebeira M, Matasar M. Patient preferences for first-line treatment of classical Hodgkin lymphoma: a US survey and discrete choice experiment. *Leuk Lymphoma*. 2020; 61:2630–37. <https://doi.org/10.1080/10428194.2020.1783443>. [PubMed]
  118. Kreissl S, Goergen H, Müller H, Meissner J, Mehnert A, Bürkle C, Fuchs M, Engert A, Behringer K, Borchmann P. Survivors' perspectives on risks and benefits of Hodgkin lymphoma treatment: results of a survey by the German Hodgkin Study Group. *Leuk Lymphoma*. 2019; 60:1389–98. <https://doi.org/10.1080/10428194.2018.1540781>. [PubMed]
  119. Adcetris (brentuximab vedotin). Highlights of Prescribing Information. Available at <https://www.accessdata.fda>

- [gov/drugsatfda\\_docs/label/2014/125388\\_s056s0781bl.pdf](https://www.accessdata.fda.gov/drugsatfda_docs/label/2014/125388_s056s0781bl.pdf)  
(Accessed 27 Jan 2022).
120. Moskowitz AJ, Herrera AF, Beaven AW. Relapsed and Refractory Classical Hodgkin Lymphoma: Keeping Pace With Novel Agents and New Options for Salvage Therapy. *Am Soc Clin Oncol Educ Book*. 2019; 39:477–86. [https://doi.org/10.1200/EDBK\\_238799](https://doi.org/10.1200/EDBK_238799). [PubMed]
121. Ramsey SD, Nademanee A, Masszi T, Holowiecki J, Abidi M, Chen A, Stiff P, Viviani S, Sweetenham JW, Radford J, Zhu Y, Bonthapally V, Thomas E, et al. Quality of life results from a phase 3 study of brentuximab vedotin consolidation following autologous haematopoietic stem cell transplant for persons with Hodgkin lymphoma. *Br J Haematol*. 2016; 175:860–67. <https://doi.org/10.1111/bjh.14316>. [PubMed]
122. Opdivo (nivolumab). Highlights of Prescribing Information. Available at [https://www.accessdata.fda.gov/drugsatfda\\_docs/label/2021/125554s0911bl.pdf](https://www.accessdata.fda.gov/drugsatfda_docs/label/2021/125554s0911bl.pdf) (Accessed 27 Jan 2022).
123. Keytruda (pembrolizumab). Highlights of Prescribing Information. Available at [https://www.accessdata.fda.gov/drugsatfda\\_docs/label/2021/125514s0961bl.pdf](https://www.accessdata.fda.gov/drugsatfda_docs/label/2021/125514s0961bl.pdf) (Accessed 27 Jan 2022).
